# Supplementary material for: Transnasal humidified rapid insufflation ventilatory exchange vs. facemask oxygenation in elderly patients undergoing general anaesthesia: a randomized controlled trial
Source: PubMed Central journal article supplement (PMC7113239; doi:10.1038/s41598-020-62716-2), 2020-04-01
Supplement: 41598_2020_62716_MOESM1_ESM.pdf [file 41598_2020_62716_MOESM1_ESM.pdf]

**Transnasal humidified rapid insufflation ventilatory exchange vs. facemask oxygenation in elderly patients undergoing general anaesthesia: a randomized controlled trial**

Zhen Hua<sup>a,\*,#</sup>, Zhen Liu<sup>a,#</sup>, Yang Li<sup>a,b</sup>, Hongye Zhang<sup>a</sup>, Ming Yang<sup>a</sup>, Mingzhang Zuo, <sup>a,\*</sup>

<sup>a</sup> Department of Anaesthesiology, Beijing Hospital, National Center of Gerontology, Institute of Geriatric Medicine, Chinese Academy of Medical Science, P.R. China

<sup>b</sup> Department of Anaesthesiology, Beijing Changping Hospital, P.R. China

<sup>#</sup> Zhen Hua and Zhen Liu contributed equally and share their first authorship.

\*Corresponding author.

**S-table 1** Termination criteria in the THRIVE group and the facemask group.

|                      | THRIVE     | Facemask | <i>P</i> -value |
|----------------------|------------|----------|-----------------|
|                      | n=30       | n=30     |                 |
| Apnea time 10 min    | 25 (83.3%) | 15 (50%) | 0.013*          |
| SpO <sub>2</sub> 90% | 5 (16.7%)  | 15 (50%) |                 |

*Data are given as n (%).*

*Abbreviations: THRIVE, transnasal humidified rapid insufflation ventilator exchange.*

*\*Statistically significantly different from the facemask group,  $P < 0.05$*

**S-table 2** Sub-analysis of PaO<sub>2</sub> on patients that apnea time reached 10 min and patients that SpO<sub>2</sub> decreased to 90%.

| PaO <sub>2</sub> (mmHg) | THRIVE         | Facemask          | <i>P</i> -value |
|-------------------------|----------------|-------------------|-----------------|
| Apnea time 10 min *     | 165 (93 ~ 269) | 160 (135.5 ~ 254) | 0.80            |
| SpO <sub>2</sub> 90%#   | 62 (56 ~ 66)   | 58 (54 ~ 74)      | 0.57            |

*Data are given as median (interquartile range).*

*Abbreviations: THRIVE, transnasal humidified rapid insufflation ventilator exchange.*

\* *n=25 in the THRIVE group; n=15 in the Facemask group.*

# *n=5 in the THRIVE group; n=13 in the Facemask group.*

**S-table 3.** Analysis of SpO<sub>2</sub> in the THRIVE group and Facemask group.

| SpO <sub>2</sub> (%) | THRIVE     | Facemask   |
|----------------------|------------|------------|
|                      | n=30       | n=28       |
| Baseline             | 95.1 ± 2.1 | 95.8 ± 2.5 |
| Pre-oxygenation      | 99.8 ± 0.5 | 99.7 ± 0.5 |
| Apnea                | 96.3 ± 4.1 | 94.0 ± 4.6 |

*Data are presented as mean ± standard deviations.*

*Abbreviations: THRIVE, transnasal humidified rapid insufflation ventilator exchange*
